# Supplementary material for: Effects of polysaccharides from wild morels on immune response and gut microbiota composition in non-treated and cyclophosphamide-treated mice
Source: Royal Society of Chemistry journal article supplement (doi:10.1039/d0fo00597e), 2020-01-01
Supplement: d0fo00597e1.7z [file d0fo00597e1.7z]

# 研究结果

## Research Result

编号 (No.) : HX-191205106

第 1 页 共 2 页

\*\*\*\*\*

### 申请信息

申请单位 陕西省微生物研究所

样品信息 羊肚菌多糖

研究项目 分子量、分子量分布

编制日期 2019.12.23

备注 以上信息由申请单位提供并确认

\*\*\*\*\*

| 研究结果       |          |                              |                       |
|------------|----------|------------------------------|-----------------------|
| 序号         | 研究项目     |                              | 结果数据                  |
| 羊肚菌多糖      |          |                              |                       |
| 1          | 分子量      | Mw/Mn                        | 1.227                 |
|            |          | Mz/Mn                        | 1.501                 |
|            |          | Mn, g/mol                    | 3.240×10 <sup>6</sup> |
|            |          | Mp, g/mol                    | 5.044×10 <sup>6</sup> |
|            |          | Mw, g/mol                    | 3.974×10 <sup>6</sup> |
|            |          | Mz, g/mol                    | 4.863×10 <sup>6</sup> |
| 2          | 分子量分布, % | 1640000.0 - 4250000.0 g/mol  | 44.0                  |
|            |          | 4250000.0 - 6800000.0 g/mol  | 53.1                  |
|            |          | 6800000.0 - 10166380.0 g/mol | 2.9                   |
| 备注         | /        |                              |                       |
| ***表格结束*** |          |                              |                       |

# 研究结果

## Research Result

编号 (No.) : HX-191205106

第 2 页 共 2 页

\*\*\*\*\*

附图:

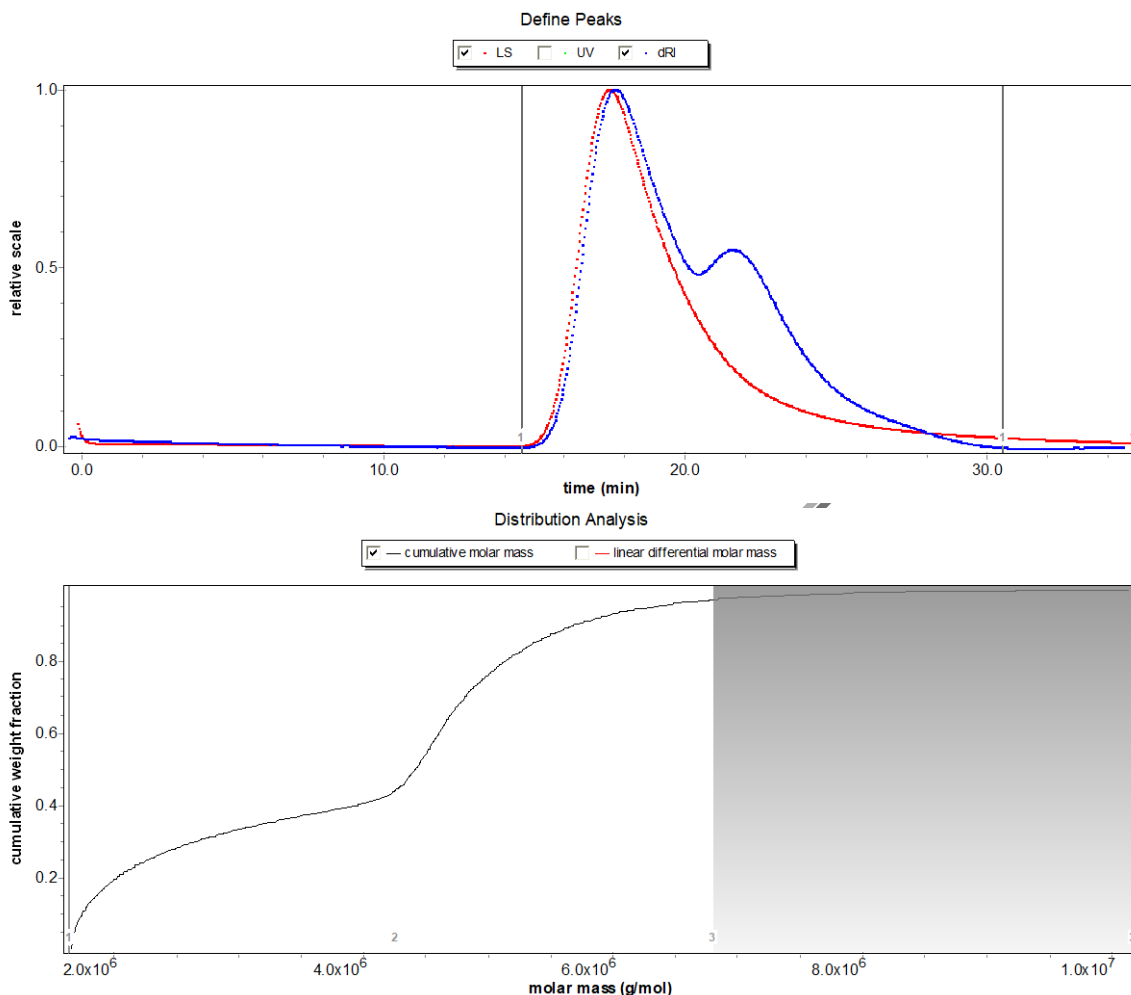

图 1 GPC 谱图 ( )

\*\*\*\*\*

注意事项:

1. 本研究结果仅对来样负责, 仅反映样品宏观理论研究结果, 并不包括 DUT 复现特性。
2. 本研究结果不具有社会证明作用, 仅供申请单位自身参考、教学研发使用, 不能用于司法仲裁、法定检验、依法抽检、社会公证等活动。
3. 申请单位如对研究结果有异议, 应在收到本研究结果后一个月内提出, 逾期不予受理。
4. 本中心将根据申请单位要求保留样品, 除申请方特殊说明外, 本中心可以在出具研究结果一个月后自行销毁。
5. 本研究结果部分复制、私自转让、盗用、冒用、涂改、增删或以其他任何形式篡改的均属无效, 本中心将对上述行为追究其相应的法律责任。

\*\*\*\*\*结束\*\*\*\*\*
