# Supplementary material for: Effects of polysaccharides from wild morels on immune response and gut microbiota composition in non-treated and cyclophosphamide-treated mice
Source: Royal Society of Chemistry journal article supplement (doi:10.1039/d0fo00597e), 2020-01-01
Supplement: d0fo00597e1.7z [file d0fo00597e1.7z]

=====  
操作者 : 序列行 : 7  
仪器 : 仪器 1 位置 : 样品瓶 6  
进样日期 : 2019/12/11 17:10:28 进样次数 : 1  
进样量 : 10.000 µl  
采集方法 : D:\CHEM32\1\DATA\201912\20191211十种单糖 2019-12-11 11-54-45\单糖组成.M  
最后修改 : 2019/12/11 13:14:58  
(调用后修改)  
分析方法 : D:\CHEM32\1\CHULIFANGFA\201912\20191212十种单糖.M  
最后修改 : 2019/12/12 14:22:57  
附加信息: 峰已手动积分

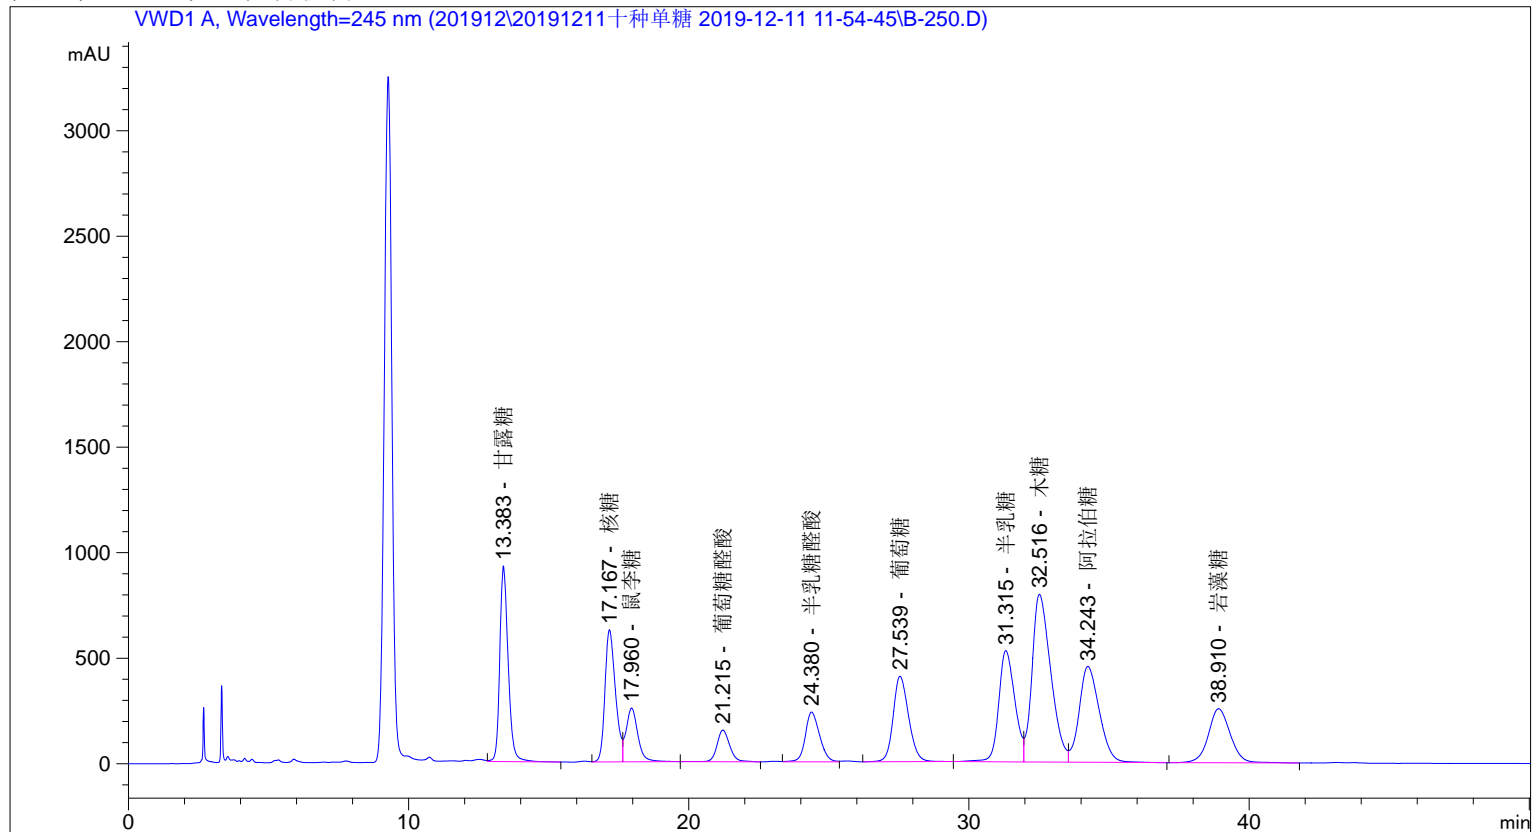

=====  
外标法报告  
=====

排序 : 信号  
校正数据修改时间 : 2019年12月12日 13:50:58  
乘积因子: : 1.0000  
稀释因子: : 1.0000  
内标使用乘积因子和稀释因子

信号 1: VWD1 A, Wavelength=245 nm

| 保留时间<br>[min] | 类型 | 峰面积<br>[mAU*s] | 含量/峰面积     | 含量<br>[ng/ul] | 组 | 名称    |
|---------------|----|----------------|------------|---------------|---|-------|
| 13.383        | VB | 1.93565e4      | 1.30263e-2 | 252.14293     |   | 甘露糖   |
| 17.167        | VV | 1.63187e4      | 1.54068e-2 | 251.41968     |   | 核糖    |
| 17.960        | VB | 7429.18945     | 3.38761e-2 | 251.67165     |   | 鼠李糖   |
| 21.215        | BB | 4716.20215     | 5.35607e-2 | 252.60320     |   | 葡萄糖醛酸 |
| 24.380        | VV | 8363.00684     | 3.02134e-2 | 252.67491     |   | 半乳糖醛酸 |
| 27.539        | BB | 1.55089e4      | 1.62478e-2 | 251.98529     |   | 葡萄糖   |
| 31.315        | BV | 2.10718e4      | 1.19755e-2 | 252.34419     |   | 半乳糖   |
| 32.516        | VV | 3.68933e4      | 1.36721e-2 | 504.40773     |   | 木糖    |
| 34.243        | VB | 2.27392e4      | 1.10923e-2 | 252.22988     |   | 阿拉伯糖  |
| 38.910        | BB | 1.39995e4      | 1.80338e-2 | 252.46281     |   | 岩藻糖   |

总量: 2773.94227

1警告或错误 :

警告: 校正警告(参见校正列表)

=====  
\*\*\* 报告结束 \*\*\*
