# Supplementary material for: Effects of polysaccharides from wild morels on immune response and gut microbiota composition in non-treated and cyclophosphamide-treated mice
Source: Royal Society of Chemistry journal article supplement (doi:10.1039/d0fo00597e), 2020-01-01
Supplement: d0fo00597e1.7z [file d0fo00597e1.7z]

样品名称: B-25

```

=====
操作者      :                               序列行 :    4
仪器        : 仪器 1                       位置   : 样品瓶 3
进样日期    : 2019/12/11 14:38:03          进样次数 :    1
                                           进样量  : 10.000 µl
采集方法    : D:\CHEM32\1\DATA\201912\20191211十种单糖 2019-12-11 11-54-45\单糖组成.M
最后修改    : 2019/12/11 13:14:58
              (调用后修改)
分析方法    : D:\CHEM32\1\CHULIFANGFA\201912\20191212十种单糖.M
最后修改    : 2019/12/12 14:22:57
附加信息: 峰已手动积分
=====

```

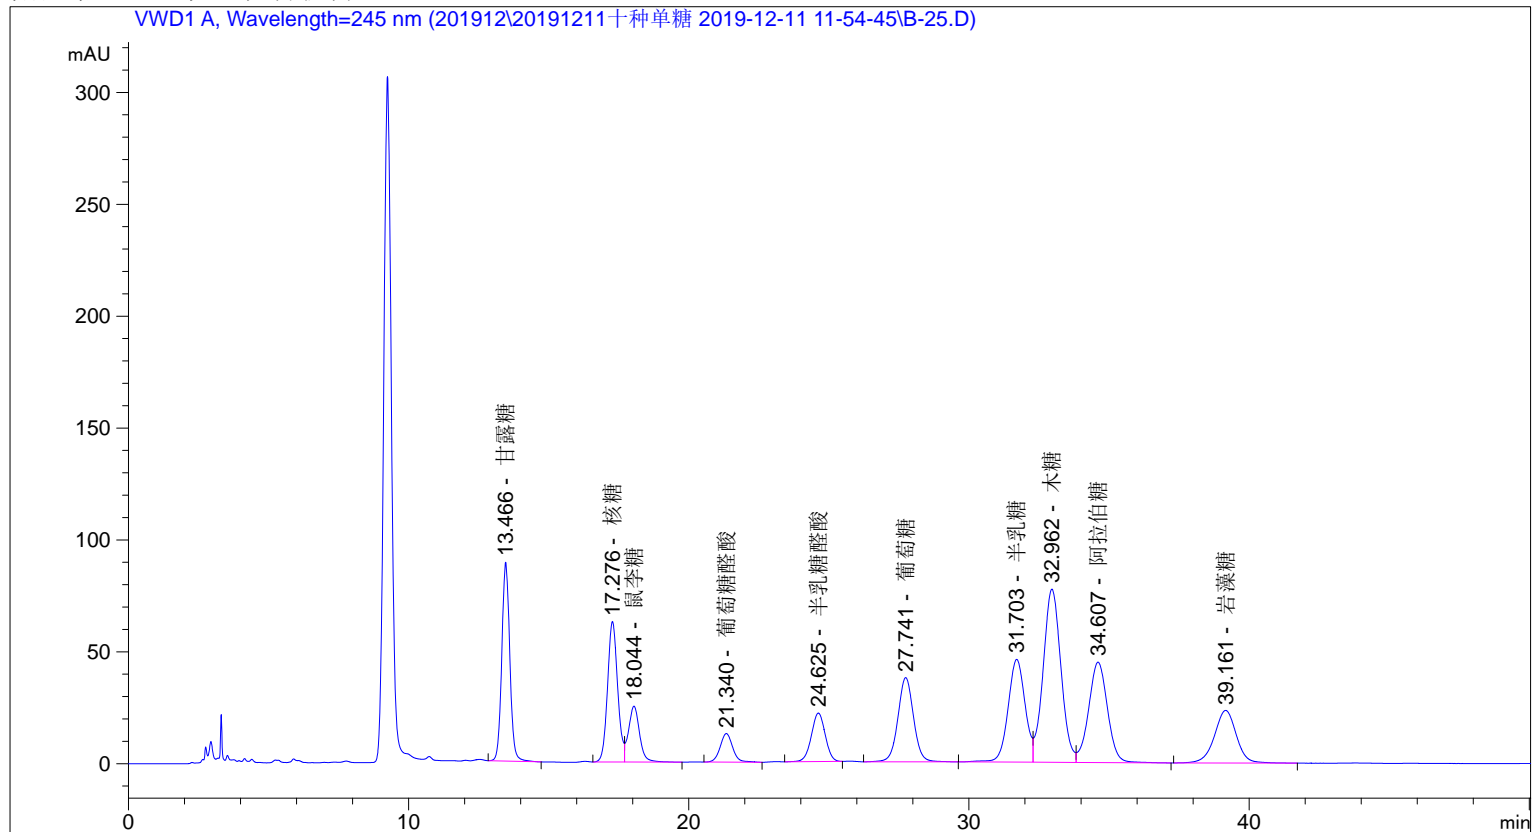

=====  
外标法报告  
=====

```

排序      :      信号
校正数据修改时间 :      2019年12月12日 13:50:58
乘积因子:      :      1.0000
稀释因子:      :      1.0000
内标使用乘积因子和稀释因子

```

信号 1: VWD1 A, Wavelength=245 nm

| 保留时间<br>[min] | 类型 | 峰面积<br>[mAU*s] | 含量/峰面积     | 含量<br>[ng/ul] | 组 | 名称    |
|---------------|----|----------------|------------|---------------|---|-------|
| 13.466        | BB | 1773.24097     | 1.41970e-2 | 25.17467      |   | 甘露糖   |
| 17.276        | BV | 1569.57898     | 1.61935e-2 | 25.41695      |   | 核糖    |
| 18.044        | VB | 685.50012      | 3.65680e-2 | 25.06736      |   | 鼠李糖   |
| 21.340        | BB | 396.41016      | 6.28768e-2 | 24.92499      |   | 葡萄糖醛酸 |
| 24.625        | BB | 742.15375      | 3.40337e-2 | 25.25823      |   | 半乳糖醛酸 |
| 27.741        | BB | 1454.57690     | 1.74970e-2 | 25.45079      |   | 葡萄糖   |
| 31.703        | BV | 1940.57788     | 1.31462e-2 | 25.51122      |   | 半乳糖   |
| 32.962        | VV | 3415.32031     | 1.49414e-2 | 51.02974      |   | 木糖    |
| 34.607        | VB | 2093.99634     | 1.21949e-2 | 25.53617      |   | 阿拉伯糖  |
| 39.161        | BB | 1276.13635     | 1.99053e-2 | 25.40186      |   | 岩藻糖   |

总量: 278.77198

1警告或错误 :

警告: 校正警告(参见校正列表)

=====  
\*\*\* 报告结束 \*\*\*
