# Supplementary material for: Effects of polysaccharides from wild morels on immune response and gut microbiota composition in non-treated and cyclophosphamide-treated mice
Source: Royal Society of Chemistry journal article supplement (doi:10.1039/d0fo00597e), 2020-01-01
Supplement: d0fo00597e1.7z [file d0fo00597e1.7z]

样品名称: B-50

```

=====
操作者      :                               序列行 :    5
仪器        : 仪器 1                       位置   : 样品瓶 4
进样日期    : 2019/12/11 15:28:52          进样次数 :    1
                                           进样量  : 10.000 µl
采集方法    : D:\CHEM32\1\DATA\201912\20191211十种单糖 2019-12-11 11-54-45\单糖组成.M
最后修改    : 2019/12/11 13:14:58
              (调用后修改)
分析方法    : D:\CHEM32\1\CHULIFANGFA\201912\20191212十种单糖.M
最后修改    : 2019/12/12 14:22:57
附加信息: 峰已手动积分
=====

```

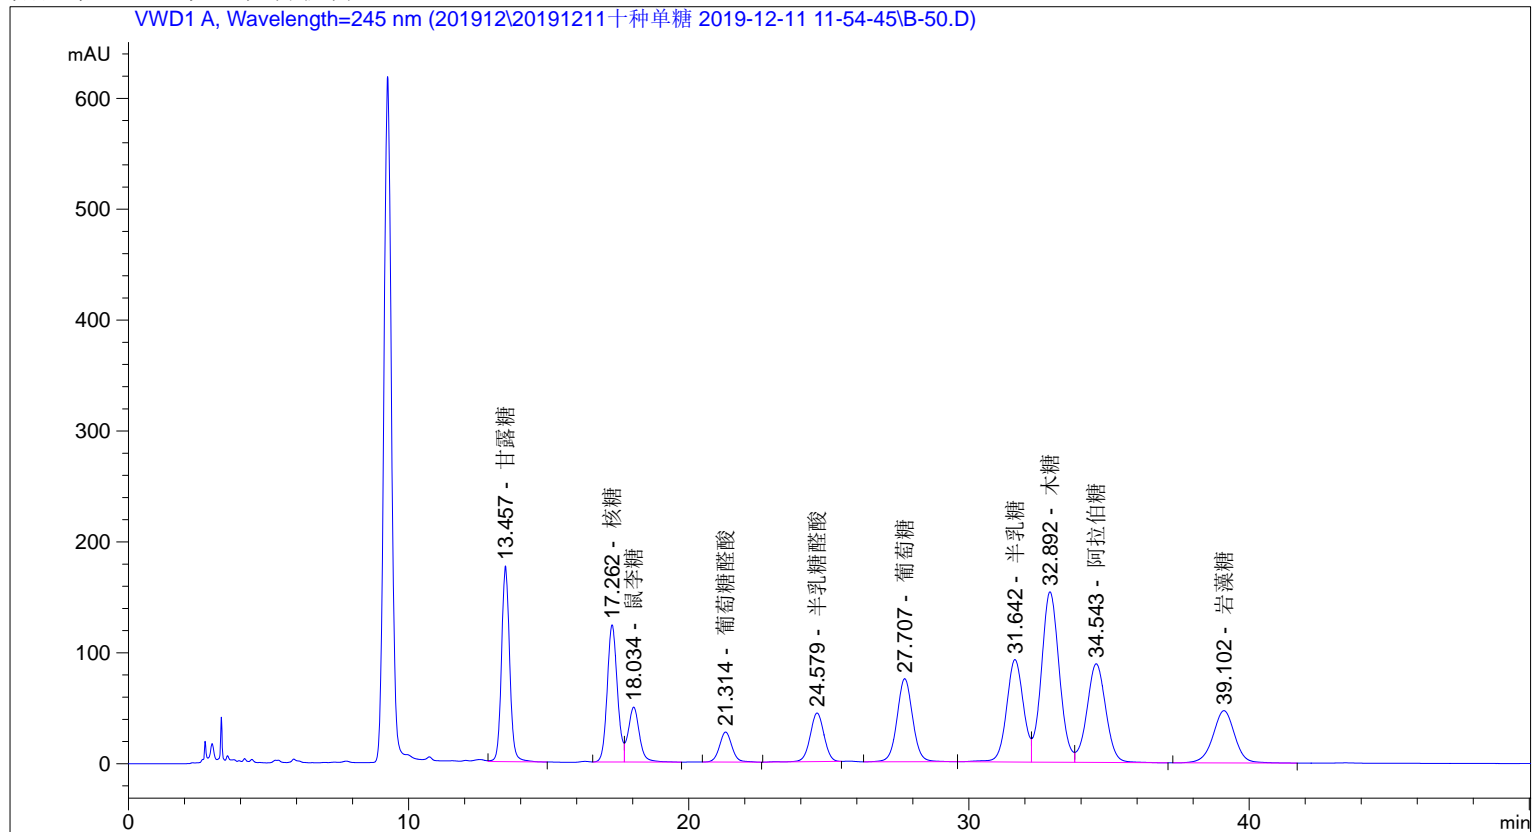

=====  
外标法报告  
=====

```

排序      :      信号
校正数据修改时间 : 2019年12月12日 13:50:58
乘积因子:      :      1.0000
稀释因子:      :      1.0000
内标使用乘积因子和稀释因子

```

信号 1: VWD1 A, Wavelength=245 nm

| 保留时间<br>[min] | 类型 | 峰面积<br>[mAU*s] | 含量/峰面积     | 含量<br>[ng/ul] | 组 | 名称    |
|---------------|----|----------------|------------|---------------|---|-------|
| 13.457        | VB | 3566.17285     | 1.35490e-2 | 48.31825      |   | 甘露糖   |
| 17.262        | BV | 3107.66187     | 1.57627e-2 | 48.98514      |   | 核糖    |
| 18.034        | VB | 1376.20227     | 3.50796e-2 | 48.27662      |   | 鼠李糖   |
| 21.314        | BB | 839.21069      | 5.75102e-2 | 48.26316      |   | 葡萄糖醛酸 |
| 24.579        | BB | 1514.41016     | 3.18959e-2 | 48.30341      |   | 半乳糖醛酸 |
| 27.707        | BB | 2893.96143     | 1.68114e-2 | 48.65150      |   | 葡萄糖   |
| 31.642        | BV | 3863.74292     | 1.25044e-2 | 48.31365      |   | 半乳糖   |
| 32.892        | VV | 6798.65088     | 1.42453e-2 | 96.84876      |   | 木糖    |
| 34.543        | VB | 4169.64160     | 1.15904e-2 | 48.32770      |   | 阿拉伯糖  |
| 39.102        | BB | 2548.46631     | 1.88772e-2 | 48.10791      |   | 岩藻糖   |

总量: 532.39610

1警告或错误 :

警告: 校正警告(参见校正列表)

=====  
\*\*\* 报告结束 \*\*\*
