# Supplementary material for: Effects of polysaccharides from wild morels on immune response and gut microbiota composition in non-treated and cyclophosphamide-treated mice
Source: Royal Society of Chemistry journal article supplement (doi:10.1039/d0fo00597e), 2020-01-01
Supplement: d0fo00597e1.7z [file d0fo00597e1.7z]

=====

|      |   |                                                                 |      |   |           |
|------|---|-----------------------------------------------------------------|------|---|-----------|
| 操作者  | : |                                                                 | 序列行  | : | 18        |
| 仪器   | : | 仪器 1                                                            | 位置   | : | 样品瓶 17    |
| 进样日期 | : | 2019/12/12 2:29:29                                              | 进样次数 | : | 1         |
|      |   |                                                                 | 进样量  | : | 10.000 µl |
| 采集方法 | : | D:\CHEM32\1\DATA\201912\20191211十种单糖 2019-12-11 11-54-45\单糖组成.M |      |   |           |
| 最后修改 | : | 2019/12/11 13:14:58<br>(调用后修改)                                  |      |   |           |
| 分析方法 | : | D:\CHEM32\1\CHULIFANGFA\201912\20191212十种单糖.M                   |      |   |           |
| 最后修改 | : | 2019/12/12 14:22:57                                             |      |   |           |

附加信息: 峰已手动积分

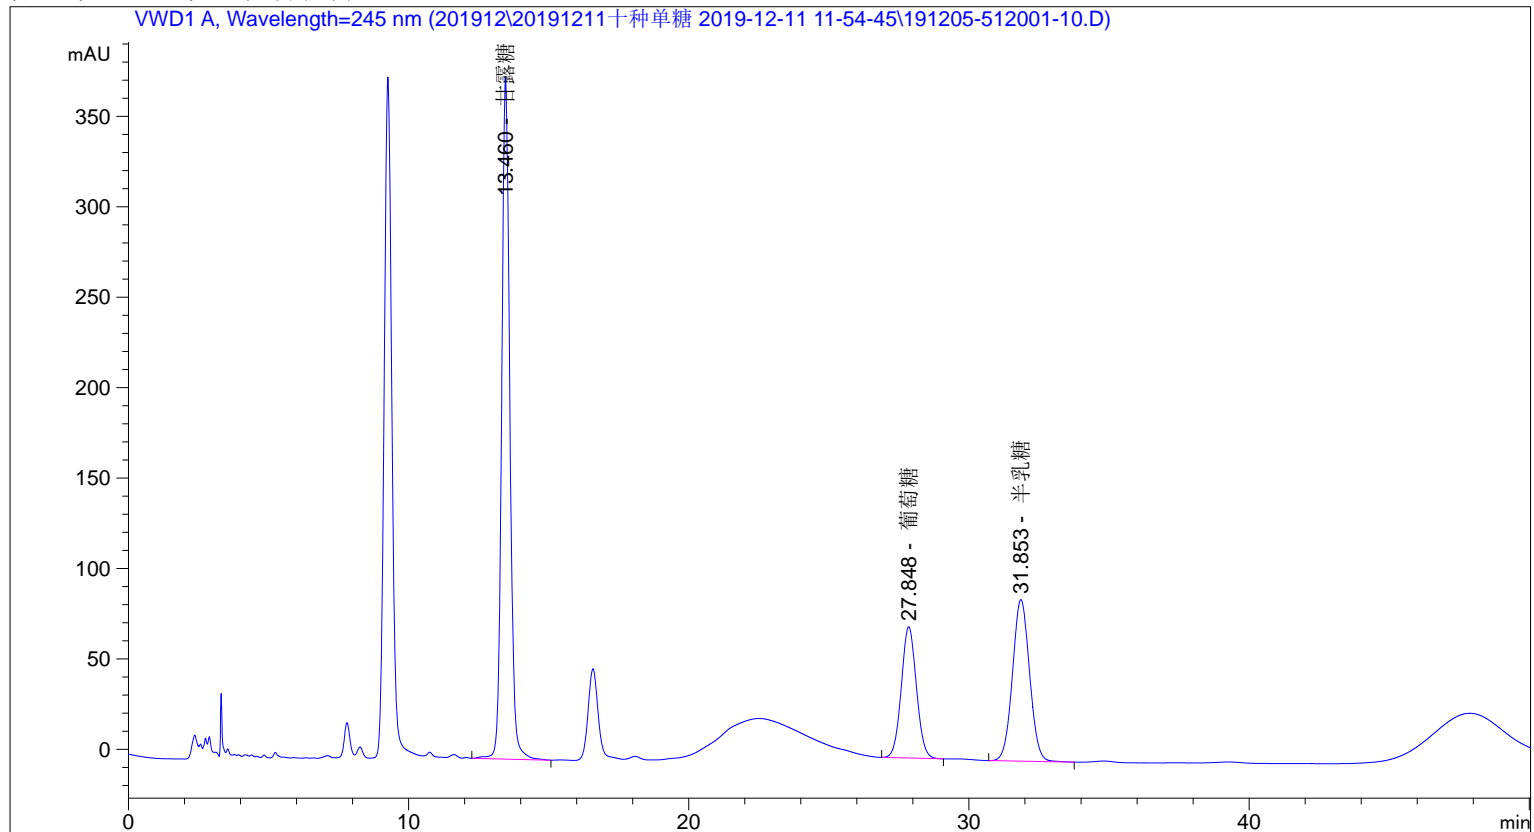

=====  
外标法报告  
=====

排序 : 信号  
校正数据修改时间 : 2019年12月12日 13:50:58  
乘积因子: : 1.0000  
稀释因子: : 1.0000  
内标使用乘积因子和稀释因子

信号 1: VWD1 A, Wavelength=245 nm

| 保留时间<br>[min] | 类型 | 峰面积<br>[mAU*s] | 含量/峰面积     | 含量<br>[ng/ul] | 组 | 名称    |
|---------------|----|----------------|------------|---------------|---|-------|
| 13.460        | BB | 7650.25439     | 1.32069e-2 | 101.03650     |   | 甘露糖   |
| 17.167        |    | -              | -          | -             |   | 核糖    |
| 17.960        |    | -              | -          | -             |   | 鼠李糖   |
| 21.215        |    | -              | -          | -             |   | 葡萄糖醛酸 |
| 24.380        |    | -              | -          | -             |   | 半乳糖醛酸 |
| 27.848        | BB | 2717.52173     | 1.68564e-2 | 45.80756      |   | 葡萄糖   |
| 31.853        | BB | 3788.70630     | 1.25172e-2 | 47.42396      |   | 半乳糖   |
| 32.516        |    | -              | -          | -             |   | 木糖    |
| 34.243        |    | -              | -          | -             |   | 阿拉伯糖  |
| 38.910        |    | -              | -          | -             |   | 岩藻糖   |

总量: 194.26803

2警告或错误 :

警告: 校正警告(参见校正列表)

警告: 未找到已校正组分

=====  
\*\*\* 报告结束 \*\*\*
