# Supplementary material for: Effects of polysaccharides from wild morels on immune response and gut microbiota composition in non-treated and cyclophosphamide-treated mice
Source: Royal Society of Chemistry journal article supplement (doi:10.1039/d0fo00597e), 2020-01-01
Supplement: d0fo00597e1.7z [file d0fo00597e1.7z]

=====  
操作者 : 序列行 : 6  
仪器 : 仪器 1 位置 : 样品瓶 5  
进样日期 : 2019/12/11 16:19:40 进样次数 : 1  
进样量 : 10.000 µl  
采集方法 : D:\CHEM32\1\DATA\201912\20191211十种单糖 2019-12-11 11-54-45\单糖组成.M  
最后修改 : 2019/12/11 13:14:58  
(调用后修改)  
分析方法 : D:\CHEM32\1\CHULIFANGFA\201912\20191212十种单糖.M  
最后修改 : 2019/12/12 14:22:57  
附加信息: 峰已手动积分

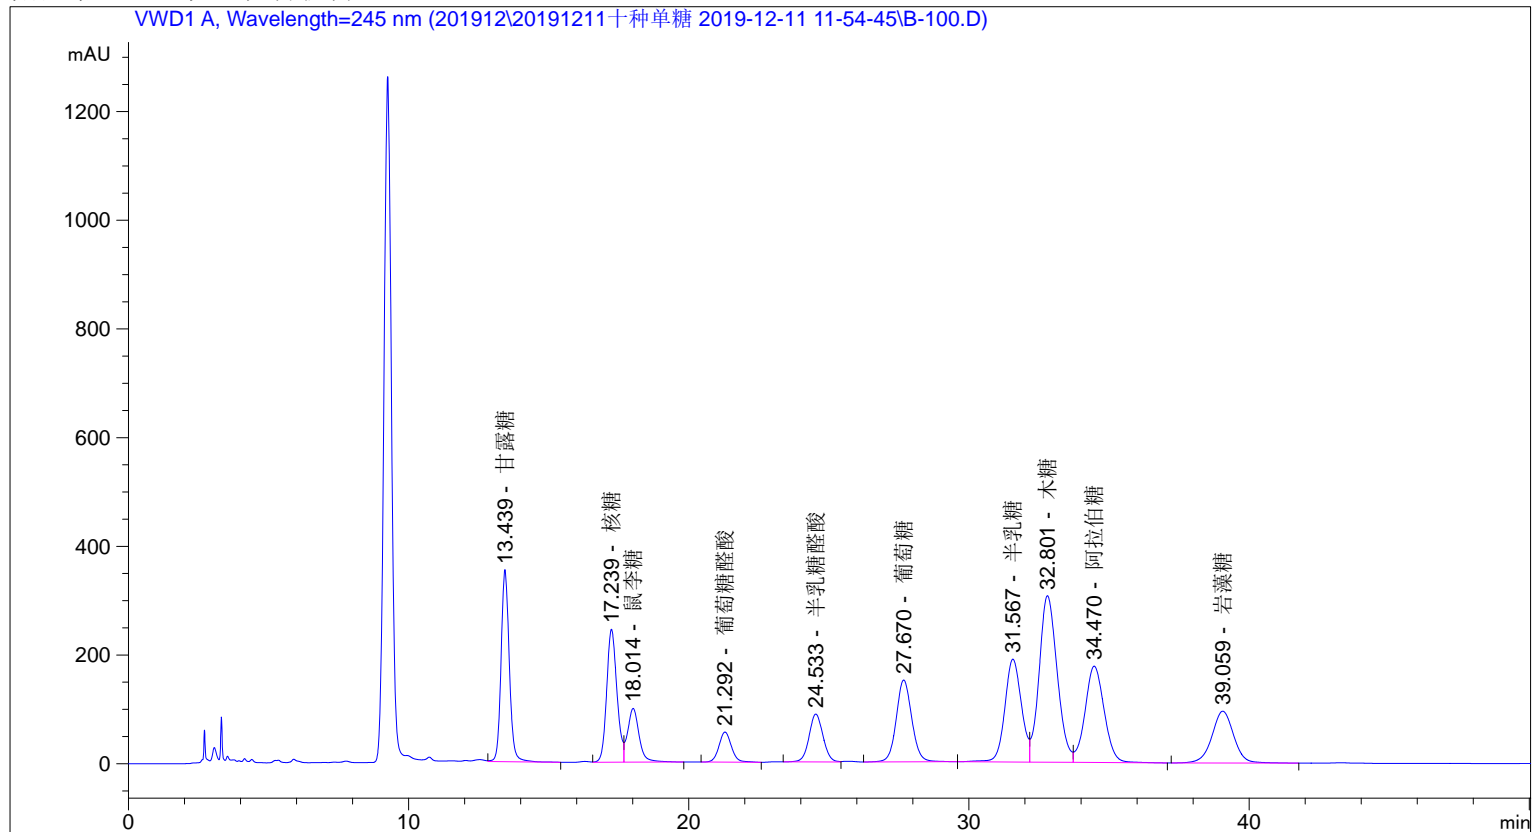

=====  
外标法报告  
=====

排序 : 信号  
校正数据修改时间 : 2019年12月12日 13:50:58  
乘积因子: : 1.0000  
稀释因子: : 1.0000  
内标使用乘积因子和稀释因子

信号 1: VWD1 A, Wavelength=245 nm

| 保留时间<br>[min] | 类型 | 峰面积<br>[mAU*s] | 含量/峰面积     | 含量<br>[ng/ul] | 组 | 名称    |
|---------------|----|----------------|------------|---------------|---|-------|
| 13.439        | VB | 7210.00146     | 1.32252e-2 | 95.35362      |   | 甘露糖   |
| 17.239        | VV | 6228.33887     | 1.55424e-2 | 96.80357      |   | 核糖    |
| 18.014        | VB | 2814.23682     | 3.43248e-2 | 96.59806      |   | 鼠李糖   |
| 21.292        | BB | 1713.38416     | 5.50590e-2 | 94.33719      |   | 葡萄糖醛酸 |
| 24.533        | BV | 3046.21606     | 3.08627e-2 | 94.01460      |   | 半乳糖醛酸 |
| 27.670        | BB | 5802.29443     | 1.64641e-2 | 95.52945      |   | 葡萄糖   |
| 31.567        | BV | 7782.50488     | 1.21783e-2 | 94.77732      |   | 半乳糖   |
| 32.801        | VV | 1.36889e4      | 1.38916e-2 | 190.16005     |   | 木糖    |
| 34.470        | VB | 8425.80859     | 1.12823e-2 | 95.06236      |   | 阿拉伯糖  |
| 39.059        | BB | 5153.55957     | 1.83560e-2 | 94.59850      |   | 岩藻糖   |

总量: 1047.23472

1警告或错误 :

警告: 校正警告(参见校正列表)

=====  
\*\*\* 报告结束 \*\*\*
