# Supplementary material for: Effects of polysaccharides from wild morels on immune response and gut microbiota composition in non-treated and cyclophosphamide-treated mice
Source: Royal Society of Chemistry journal article supplement (doi:10.1039/d0fo00597e), 2020-01-01
Supplement: d0fo00597e1.7z [file d0fo00597e1.7z]

样品名称: B-5

```

=====
操作者      :                               序列行 :    3
仪器        : 仪器 1                       位置   : 样品瓶 2
进样日期    : 2019/12/11 13:47:12          进样次数 :    1
                                           进样量  : 10.000 µl
采集方法    : D:\CHEM32\1\DATA\201912\20191211十种单糖 2019-12-11 11-54-45\单糖组成.M
最后修改    : 2019/12/11 13:14:58
              (调用后修改)
分析方法    : D:\CHEM32\1\CHULIFANGFA\201912\20191212十种单糖.M
最后修改    : 2019/12/12 14:22:57
附加信息: 峰已手动积分
  
```

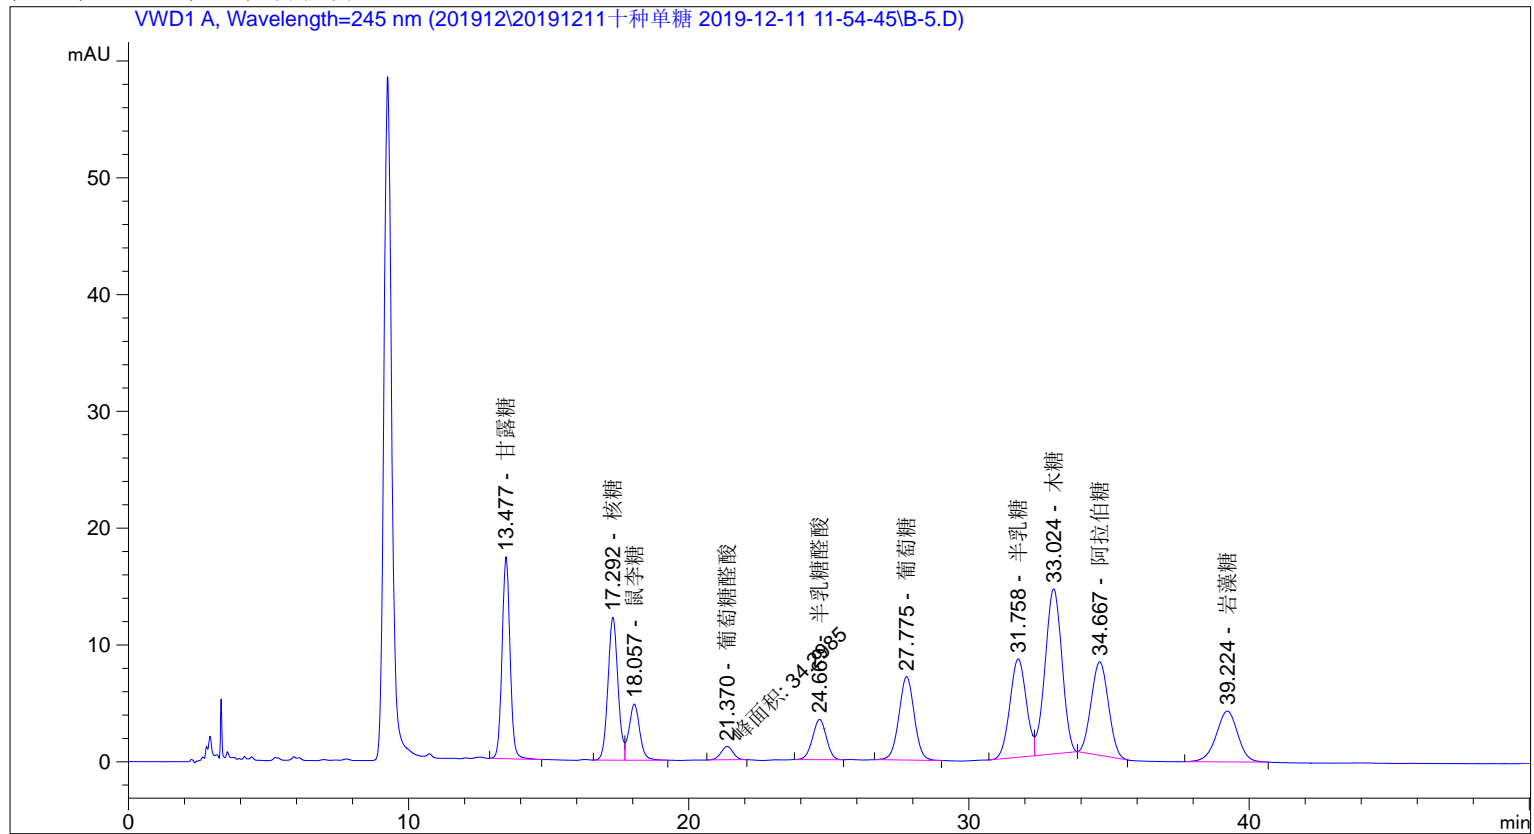

=====

外标法报告

=====

```

排序      :      信号
校正数据修改时间 :      2019年12月12日 13:50:58
乘积因子:      :      1.0000
稀释因子:      :      1.0000
内标使用乘积因子和稀释因子
  
```

信号 1: VWD1 A, Wavelength=245 nm

| 保留时间<br>[min] | 类型 | 峰面积<br>[mAU*s] | 含量/峰面积     | 含量<br>[ng/ul] | 组 | 名称    |
|---------------|----|----------------|------------|---------------|---|-------|
| 13.477        | BB | 343.96527      | 1.95521e-2 | 6.72526       |   | 甘露糖   |
| 17.292        | BV | 302.96646      | 1.98323e-2 | 6.00852       |   | 核糖    |
| 18.057        | VB | 128.57773      | 4.94130e-2 | 6.35342       |   | 鼠李糖   |
| 21.370        | MM | 34.29849       | 1.70258e-1 | 5.83959       |   | 葡萄糖醛酸 |
| 24.669        | BB | 118.16373      | 5.61722e-2 | 6.63751       |   | 半乳糖醛酸 |
| 27.775        | BB | 271.27560      | 2.35103e-2 | 6.37776       |   | 葡萄糖   |
| 31.758        | BV | 341.49057      | 1.91844e-2 | 6.55129       |   | 半乳糖   |
| 33.024        | VB | 590.63464      | 2.16313e-2 | 12.77622      |   | 木糖    |
| 34.667        | BB | 342.20941      | 1.84120e-2 | 6.30075       |   | 阿拉伯糖  |
| 39.224        | BB | 233.84241      | 2.90839e-2 | 6.80104       |   | 岩藻糖   |

总量: 70.37136

1警告或错误 :

警告: 校正警告(参见校正列表)

=====  
\*\*\* 报告结束 \*\*\*
