# Supplementary material for: Effects of polysaccharides from wild morels on immune response and gut microbiota composition in non-treated and cyclophosphamide-treated mice
Source: Royal Society of Chemistry journal article supplement (doi:10.1039/d0fo00597e), 2020-01-01
Supplement: d0fo00597e1.7z [file d0fo00597e1.7z]

=====  
操作者 : 序列行 : 8  
仪器 : 仪器 1 位置 : 样品瓶 7  
进样日期 : 2019/12/11 18:01:18 进样次数 : 1  
进样量 : 10.000 µl  
采集方法 : D:\CHEM32\1\DATA\201912\20191211十种单糖 2019-12-11 11-54-45\单糖组成.M  
最后修改 : 2019/12/11 13:14:58  
(调用后修改)  
分析方法 : D:\CHEM32\1\CHULIFANGFA\201912\20191212十种单糖.M  
最后修改 : 2019/12/12 14:22:57  
附加信息: 峰已手动积分

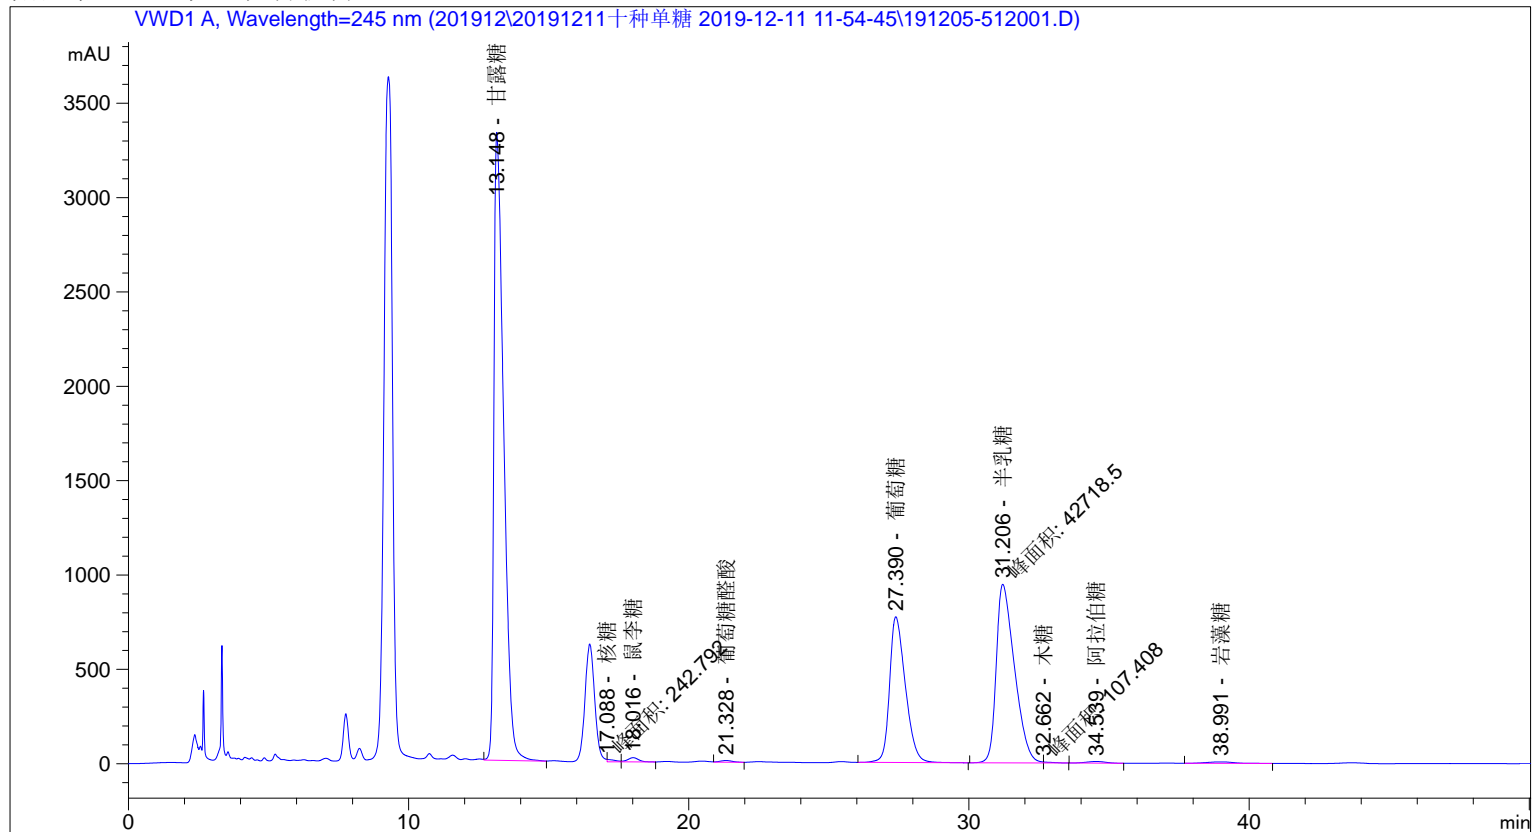

=====  
外标法报告  
=====

排序 : 信号  
校正数据修改时间 : 2019年12月12日 13:50:58  
乘积因子: : 1.0000  
稀释因子: : 1.0000  
内标使用乘积因子和稀释因子

信号 1: VWD1 A, Wavelength=245 nm

| 保留时间<br>[min] | 类型 | 峰面积<br>[mAU*s] | 含量/峰面积     | 含量<br>[ng/ul] | 组 | 名称    |
|---------------|----|----------------|------------|---------------|---|-------|
| 13.148        | VV | 8.03391e4      | 1.29367e-2 | 1039.32090    |   | 甘露糖   |
| 17.088        | FM | 242.79237      | 2.09499e-2 | 5.08647       |   | 核糖    |
| 18.016        | VV | 636.31903      | 3.67972e-2 | 23.41475      |   | 鼠李糖   |
| 21.328        | VV | 284.49506      | 6.68778e-2 | 19.02641      |   | 葡萄糖醛酸 |
| 24.380        |    | -              | -          | -             |   | 半乳糖醛酸 |
| 27.390        | BB | 3.02685e4      | 1.61847e-2 | 489.88710     |   | 葡萄糖   |
| 31.206        | MF | 4.27185e4      | 1.19153e-2 | 509.00317     |   | 半乳糖   |
| 32.662        | FM | 107.40840      | 5.80224e-2 | 6.23209       |   | 木糖    |
| 34.539        | BB | 418.51315      | 1.70570e-2 | 7.13860       |   | 阿拉伯糖  |
| 38.991        | BB | 538.40625      | 2.27269e-2 | 12.23630      |   | 岩藻糖   |

总量: 2111.34579

2警告或错误 :

警告: 校正警告(参见校正列表)

警告: 未找到已校正组分

=====  
\*\*\* 报告结束 \*\*\*
