# Supplementary material for: Effects of polysaccharides from wild morels on immune response and gut microbiota composition in non-treated and cyclophosphamide-treated mice
Source: Royal Society of Chemistry journal article supplement (doi:10.1039/d0fo00597e), 2020-01-01
Supplement: d0fo00597e1.7z [file d0fo00597e1.7z]

## 校正表

校正数据修改时间 : 2019年12月12日 13:50:58

相对参比窗口 : 5.000 %  
 绝对参比窗口 : 0.000 min  
 相对非参比窗口 : 5.000 %  
 绝对非参比窗口 : 0.000 min  
 未校正峰 : 未被报告  
 部分校正 : 是的, 标识的峰已重新校正  
 修正所有保留时间 : 不, 只有标识的峰

曲线类型 : 线性  
 原点 : 含原点  
 权重 : 均等

重新校正设置 :  
 平均响应值 : 平均所有校正值  
 平均保留时间 : 加权平均新校正值 75%

## 校正报告选项 :

序列中重新校正打印输出:  
 重新校正后的校正表  
 重新校正后的归一化报告  
 如果区间循环校正序列已经完成:  
 第一个周期的结果(结束上一个区间循环校正)

信号 1: VWD1 A, Wavelength=245 nm

| 保留时间<br>[min] | 级别<br>信号 | 含量<br>[ng/ul] | 峰面积        | 含量/峰面积     | 参比 组 名称 |
|---------------|----------|---------------|------------|------------|---------|
| 13.383        | 1 1      | 5.00000       | 343.96527  | 1.45364e-2 | 甘露糖     |
|               | 2        | 25.00000      | 1773.24097 | 1.40985e-2 |         |
|               | 3        | 50.00000      | 3566.17285 | 1.40206e-2 |         |
|               | 4        | 100.00000     | 7210.00146 | 1.38696e-2 |         |
|               | 5        | 250.00000     | 1.93565e4  | 1.29156e-2 |         |
| 17.167        | 1 1      | 5.00000       | 302.96646  | 1.65035e-2 | 核糖      |
|               | 2        | 25.00000      | 1569.57898 | 1.59278e-2 |         |
|               | 3        | 50.00000      | 3107.66187 | 1.60893e-2 |         |
|               | 4        | 100.00000     | 6228.33887 | 1.60556e-2 |         |
|               | 5        | 250.00000     | 1.63187e4  | 1.53198e-2 |         |
| 17.960        | 1 1      | 5.00000       | 128.57773  | 3.88870e-2 | 鼠李糖     |
|               | 2        | 25.00000      | 685.50012  | 3.64697e-2 |         |
|               | 3        | 50.00000      | 1376.20227 | 3.63319e-2 |         |
|               | 4        | 100.00000     | 2814.23682 | 3.55336e-2 |         |
|               | 5        | 250.00000     | 7429.18945 | 3.36510e-2 |         |
| 21.215        | 1 1      | 5.00000       | 34.29849   | 1.45779e-1 | 葡萄糖醛酸   |
|               | 2        | 25.00000      | 396.41016  | 6.30660e-2 |         |
|               | 3        | 50.00000      | 839.21069  | 5.95798e-2 |         |
|               | 4        | 100.00000     | 1713.38416 | 5.83640e-2 |         |
|               | 5        | 250.00000     | 4716.20215 | 5.30088e-2 |         |
| 24.380        | 1 1      | 5.00000       | 118.16373  | 4.23142e-2 | 半乳糖醛酸   |
|               | 2        | 25.00000      | 742.15375  | 3.36857e-2 |         |
|               | 3        | 50.00000      | 1514.41016 | 3.30162e-2 |         |
|               | 4        | 100.00000     | 3046.21606 | 3.28276e-2 |         |
|               | 5        | 250.00000     | 8363.00684 | 2.98936e-2 |         |
| 27.539        | 1 1      | 5.00000       | 271.27560  | 1.84314e-2 | 葡萄糖     |
|               | 2        | 25.00000      | 1454.57690 | 1.71871e-2 |         |
|               | 3        | 50.00000      | 2893.96143 | 1.72774e-2 |         |
|               | 4        | 100.00000     | 5802.29443 | 1.72346e-2 |         |
|               | 5        | 250.00000     | 1.55089e4  | 1.61198e-2 |         |
| 31.315        | 1 1      | 5.00000       | 341.49057  | 1.46417e-2 | 半乳糖     |
|               | 2        | 25.00000      | 1940.57788 | 1.28828e-2 |         |

| 保留时间<br>[min]                           | 级别<br>信号 | 含量<br>[ng/ul] | 峰面积        | 含量/峰面积     | 参比 组 名称 |
|-----------------------------------------|----------|---------------|------------|------------|---------|
| ----- --- --- ----- ----- --- --- ----- |          |               |            |            |         |
| 32.516                                  | 1        | 3 50.00000    | 3863.74292 | 1.29408e-2 | 木糖      |
|                                         |          | 4 100.00000   | 7782.50488 | 1.28493e-2 |         |
|                                         |          | 5 250.00000   | 2.10718e4  | 1.18642e-2 |         |
|                                         |          | 1 10.00000    | 590.63464  | 1.69309e-2 |         |
|                                         |          | 2 50.00000    | 3415.32031 | 1.46399e-2 |         |
| 34.243                                  | 1        | 3 100.00000   | 6798.65088 | 1.47088e-2 | 阿拉伯糖    |
|                                         |          | 4 200.00000   | 1.36889e4  | 1.46104e-2 |         |
|                                         |          | 5 500.00000   | 3.68933e4  | 1.35526e-2 |         |
|                                         |          | 1 5.00000     | 342.20941  | 1.46109e-2 |         |
|                                         |          | 2 25.00000    | 2093.99634 | 1.19389e-2 |         |
| 38.910                                  | 1        | 3 50.00000    | 4169.64160 | 1.19914e-2 | 岩藻糖     |
|                                         |          | 4 100.00000   | 8425.80859 | 1.18683e-2 |         |
|                                         |          | 5 250.00000   | 2.27392e4  | 1.09942e-2 |         |
|                                         |          | 1 5.00000     | 233.84241  | 2.13819e-2 |         |
|                                         |          | 2 25.00000    | 1276.13635 | 1.95904e-2 |         |
|                                         |          | 3 50.00000    | 2548.46631 | 1.96196e-2 |         |
|                                         |          | 4 100.00000   | 5153.55957 | 1.94041e-2 |         |
|                                         |          | 5 250.00000   | 1.39995e4  | 1.78578e-2 |         |

2警告或错误：

警告：重叠峰时间窗口在17.167 min,信号 1

警告：重叠峰时间窗口在31.315 min,信号 1

### 峰加和表

\*\*\*表格中没有条目\*\*\*

### 校正曲线

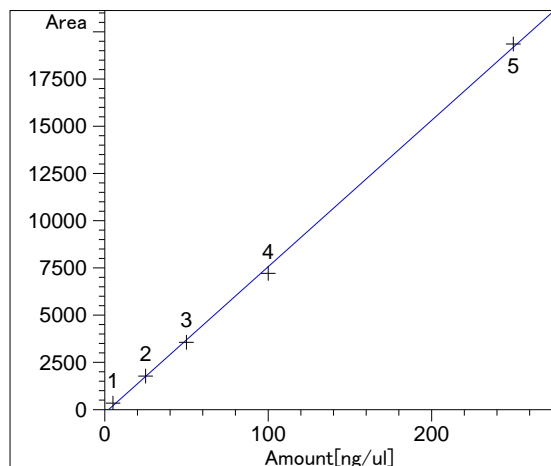

甘露糖 预期 保留时间: 13.383  
 VWD1 A, Wavelength=245 nm  
 相关性: 0.99958  
 残留标准误差: 236.37495  
 公式:  $y = mx + b$   
 m: 77.46997  
 b: -177.04019  
 x: 含量  
 y: 面积

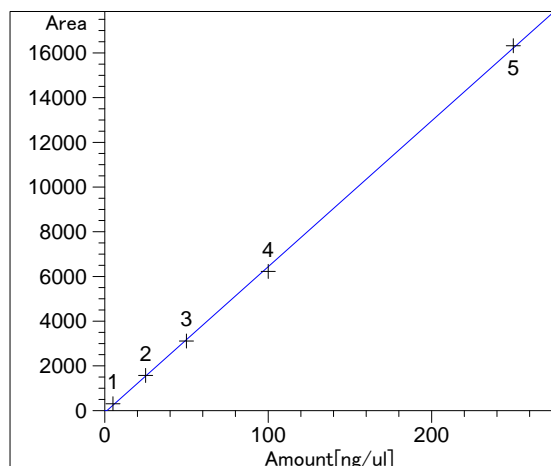

核糖 预期 保留时间: 17.167  
 VWD1 A, Wavelength=245 nm  
 相关性: 0.99982  
 残留标准误差: 131.82027  
 公式:  $y = mx + b$   
 m: 65.26097  
 b: -89.15560  
 x: 含量  
 y: 面积

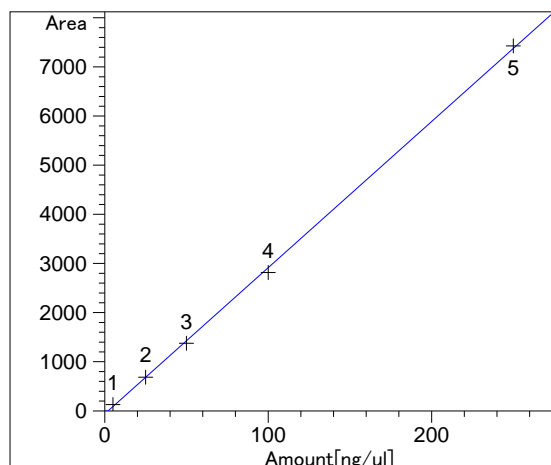

鼠李糖 预期 保留时间: 17.960  
VWD1 A, Wavelength=245 nm  
相关性: 0.99974  
残留标准误差: 71.83536  
公式:  $y = mx + b$   
m: 29.75976  
b: -60.49843  
x: 含量  
y: 面积

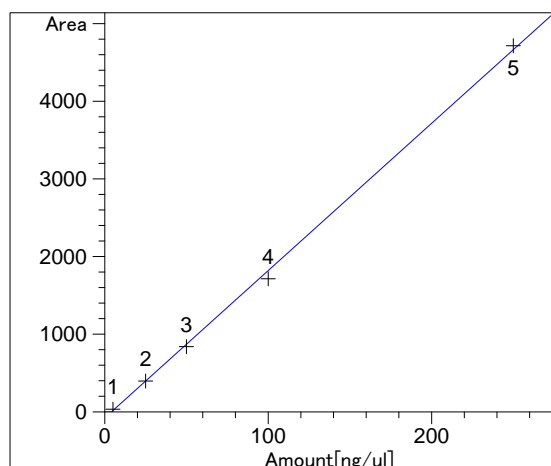

葡萄糖醛酸 预期 保留时间: 21.215  
VWD1 A, Wavelength=245 nm  
相关性: 0.99934  
残留标准误差: 72.76125  
公式:  $y = mx + b$   
m: 18.97323  
b: -76.49750  
x: 含量  
y: 面积

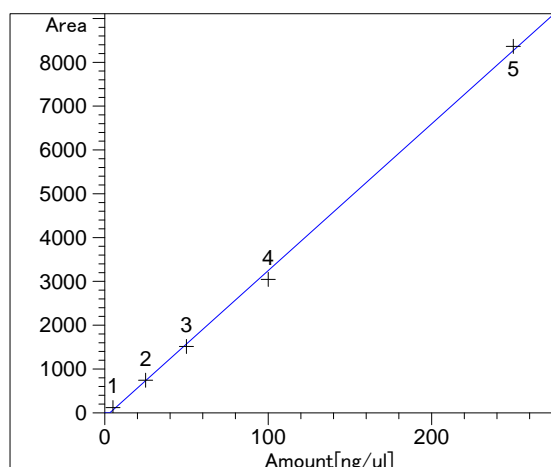

半乳糖醛酸 预期 保留时间: 24.380  
VWD1 A, Wavelength=245 nm  
相关性: 0.99935  
残留标准误差: 127.91978  
公式:  $y = mx + b$   
m: 33.51053  
b: -104.26279  
x: 含量  
y: 面积

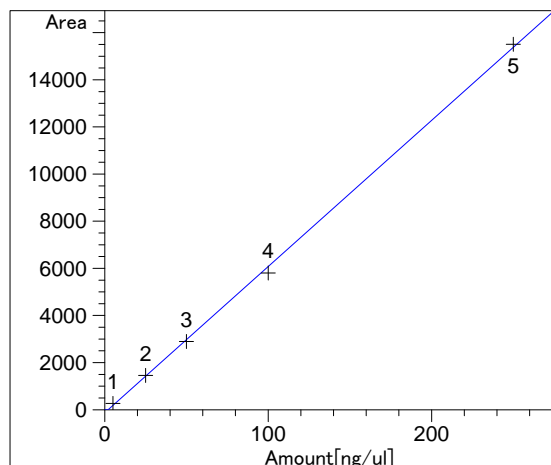

葡萄糖 预期 保留时间: 27.539  
VWD1 A, Wavelength=245 nm  
相关性: 0.99964  
残留标准误差: 175.11472  
公式:  $y = mx + b$   
m: 62.04054  
b: -124.40418  
x: 含量  
y: 面积

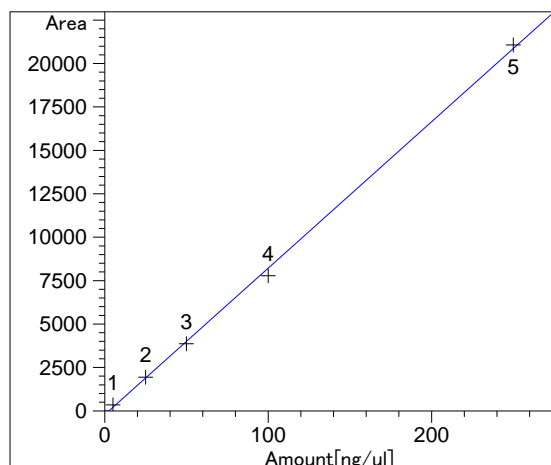

半乳糖 预期 保留时间: 31.315  
VWD1 A, Wavelength=245 nm  
相关性: 0.99950  
残留标准误差: 281.45202  
公式:  $y = mx + b$   
m: 84.34035  
b: -211.04726  
x: 含量  
y: 面积

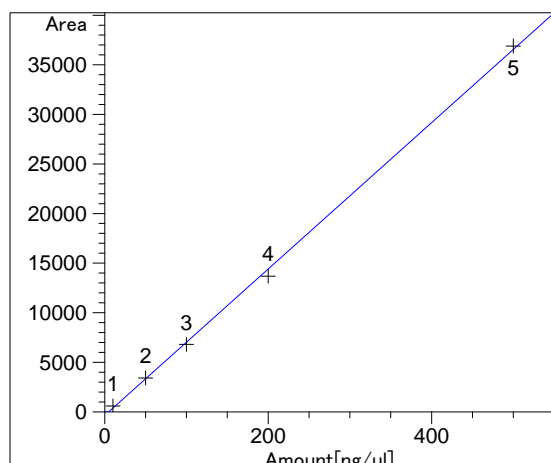

木糖 预期 保留时间: 32.516  
VWD1 A, Wavelength=245 nm  
相关性: 0.99956  
残留标准误差: 463.75462  
公式:  $y = mx + b$   
m: 73.84119  
b: -352.77644  
x: 含量  
y: 面积

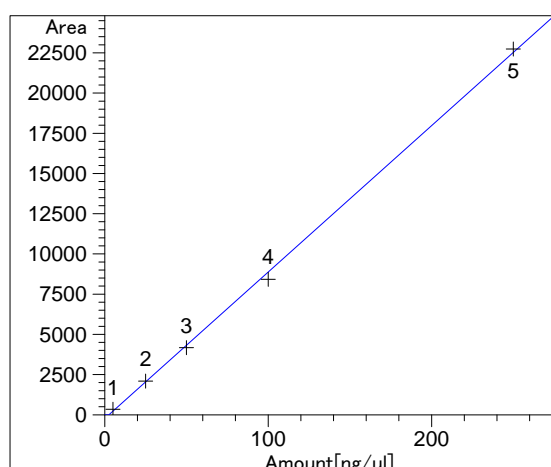

阿拉伯糖 预期 保留时间: 34.243  
VWD1 A, Wavelength=245 nm  
相关性: 0.99955  
残留标准误差: 290.12977  
公式:  $y = mx + b$   
m: 91.07089  
b: -231.60548  
x: 含量  
y: 面积

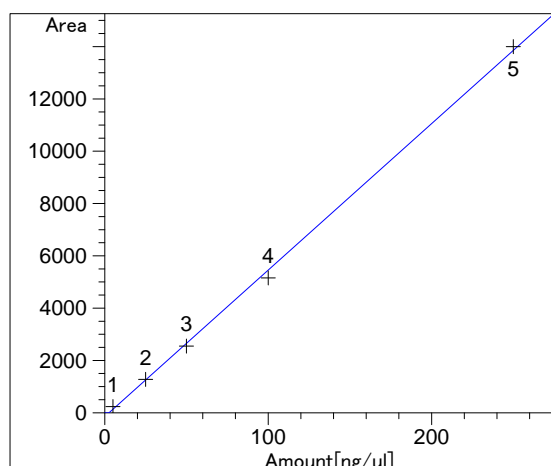

岩藻糖 预期 保留时间: 38.910  
VWD1 A, Wavelength=245 nm  
相关性: 0.99945  
残留标准误差: 196.38723  
公式:  $y = mx + b$   
m: 56.03485  
b: -147.25288  
x: 含量  
y: 面积
